# Supplementary material for: RNA-Seq Analysis Reveals a Positive Role of HTR2A in Adipogenesis in Yan Yellow Cattle
Source: MDPI journal article supplement (doi:10.3390/ijms19061760), 2018-06-13
Supplement: s1 [file s1]

## Supplementary Materials

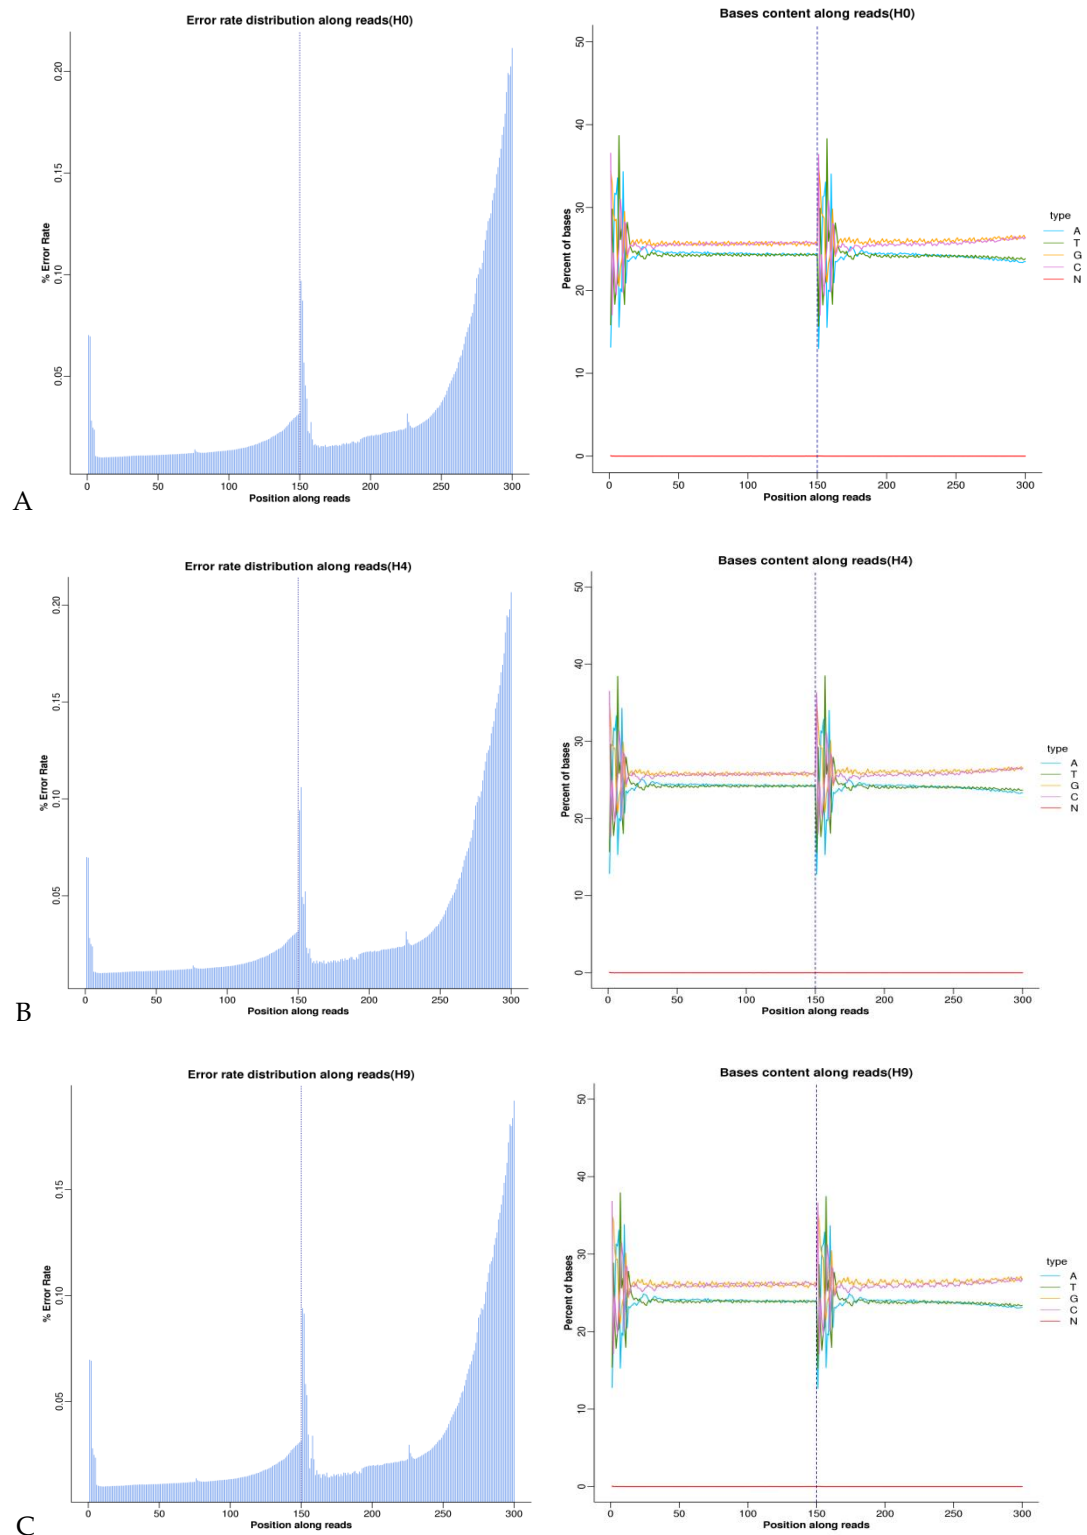

**Figure S1.** Comparison of error rate distribution and bases content along reads during varieties of adipogenesis stages. (A): The Q20 % and the GC content (%) of early stage of differentiation (Day-0); (B): The Q20 % and the GC content (%) of middle stage of differentiation (Day-4); (C): The Q20 % and

the GC content (%) of mature stage of differentiation (Day-9). Error identification ratio of nucleotides with Phred quality score  $< 0.01$ .
